# Supplementary material
Source: publisher site journal article supplement (https://www.spandidos-publications.com/1809/downloadSupplementary)
Supplement: Supplementary file 1 [file downloadSupplementary]

## Sheet: Sheet1
Table SV. Differentially expressed genes identified by the analysis of RNA sequencing data in The Cancer Genome Atlas LIHC dataset (|log2FC| ≥2 and adj P value <0.05). FC, fold-change; FDR, false discovery rate; adj, adjusted; CPM, counts per million.
A, Upregulated genes
Gene	logFC	logCPM	P-value	FDR
ZIC2	7.85024	0.78907	0.000882127	0.0369874
AC093904.2	6.46448	-2.01738	0.000773211	0.0337263
AFAP1-AS1	4.71382	5.20494	0.00127838	0.0477131
AC020907.1	4.59723	-0.174271	0.000652617	0.0296574
AL365356.4	4.07057	-1.0609	0.000424482	0.0214103
PPP1R14D	4.06735	2.85379	0.000789271	0.0342331
SPDEF	4.01223	5.05679	0.00132856	0.0486923
ABCA12	3.97039	1.98657	0.00061151	0.0282783
LINC00628	3.86577	-2.22222	0.000940787	0.0385833
LINC00365	3.78466	0.00604546	0.00132932	0.0486923
AL121772.1	3.28016	0.507014	0.000313312	0.0171847
C2orf70	3.23928	1.95721	0.000990596	0.0398996
AC009065.5	3.14646	1.93407	0.000591473	0.0278001
FXYD3	3.02532	8.31734	0.000710311	0.0315518
AC009065.2	2.9158	2.06823	0.00134313	0.0490459
SLC7A11	2.87307	4.16041	0.00104765	0.041467
TSPAN1	2.86155	8.1907	0.000728974	0.0321544
STYK1	2.73342	3.56158	0.000794848	0.0343815
SH3TC2	2.68296	1.93444	0.000826899	0.0354813
B3GNT3	2.65221	6.70404	0.000442761	0.0220946
CKMT1A	2.59071	2.70015	0.00121929	0.0461077
JPH1	2.51991	3.05704	0.00103864	0.0413072
CHRNA5	2.46989	2.20177	0.00103802	0.0413072
HIST1H2BD	2.43757	3.92112	0.00103634	0.0413072
HIST2H2BE	2.2306	4.90153	0.00127362	0.0475918
KCNK1	2.08082	5.95889	0.0013398	0.0490191
B, Downregulated genes
Gene	logFC	logCPM	P-value	FDR
HLA-DQB1-AS1	-2.00343	0.684749	0.00010349	0.00741788
MATK	-2.00769	2.05216	7.87111e-07	0.000179883
TRGV3	-2.00864	-2.67378	0.000396272	0.0204866
CDCA4P1	-2.01038	-3.04656	3.49499e-05	0.00341254
AL353801.1	-2.01076	-3.72923	0.000112619	0.00792809
HLA-DQA2	-2.01167	4.99767	0.000802884	0.0346393
SIGLEC22P	-2.01339	-2.93727	2.47873e-05	0.00266728
LINC02244	-2.01469	-2.66906	0.00105297	0.0415625
TEX53	-2.01487	-3.91066	3.98209e-05	0.0037601
SPATA21	-2.01583	-2.65236	0.000864705	0.0364932
SIGLEC5	-2.01626	-0.494367	5.21615e-05	0.0045196
DNAH8	-2.01779	-1.67407	0.00107068	0.0418993
GIMAP5	-2.01818	1.09147	3.35905e-05	0.00331101
FGD2	-2.02147	3.96407	1.46641e-07	4.85558e-05
AP001994.1	-2.02187	-3.82073	0.00104792	0.041467
AP003086.1	-2.02478	-2.47856	1.80038e-05	0.0021353
AL031595.1	-2.0252	-2.45783	8.76448e-05	0.00664457
LINC00943	-2.02658	-2.3419	5.56432e-05	0.00474291
AC105105.1	-2.02968	-3.60538	0.000929504	0.0383198
AJAP1	-2.03085	1.62639	0.000104931	0.00748714
IL4I1	-2.03198	3.28521	1.16384e-05	0.00152938
P2RX5-TAX1BP3	-2.03693	-0.365113	3.94182e-07	0.000105995
AC006946.3	-2.03693	-3.73544	0.00107921	0.0420717
FGR	-2.03712	4.2035	1.80893e-07	5.71266e-05
RN7SL5P	-2.03998	-3.27509	5.33631e-05	0.00459826
AL683807.1	-2.04099	-1.15855	0.000121225	0.00838421
AC063977.6	-2.04128	-3.31307	3.41492e-05	0.00335513
PPP1R16B	-2.04218	4.1009	1.01464e-05	0.00136234
AC010247.1	-2.04239	-2.32561	0.000178255	0.0112661
LINC01645	-2.04329	-3.09409	5.83607e-05	0.00493453
AC083949.1	-2.04442	-2.16269	0.00038603	0.0201233
AC103809.1	-2.04499	-3.65079	0.000110552	0.00779995
PTCRA	-2.04786	-1.72203	0.000117775	0.00818151
CD27	-2.0489	2.55104	0.000270631	0.0155185
ACAP1	-2.0531	4.21099	7.01871e-06	0.00100616
KLF1	-2.05321	-3.47477	1.00388e-05	0.00135881
TRAF3IP3	-2.05455	3.24572	5.87831e-05	0.00494373
PARVG	-2.05627	4.33754	3.96582e-07	0.000105995
EIF3FP1	-2.05644	-3.80992	0.000201493	0.0124358
SPATC1	-2.05773	-1.14262	1.80774e-05	0.0021353
IL24	-2.05962	1.86223	0.000883111	0.0369874
CD244	-2.06128	0.346801	3.38249e-06	0.000570466
PLEK	-2.06158	4.38243	6.06683e-06	0.00089829
BTK	-2.06418	3.51683	7.65178e-06	0.00108216
AC023510.2	-2.06699	-1.4243	1.35597e-05	0.00171745
TM4SF19-TCTEX1D2	-2.07098	-3.79959	0.00068349	0.0308382
CX3CR1	-2.07616	1.91429	4.46389e-05	0.00404546
AL359885.1	-2.07635	-3.83166	5.9616e-06	0.000886873
LINC01010	-2.07975	-1.73382	8.56981e-05	0.00654418
NCF1	-2.08195	2.10842	3.076e-05	0.00310933
GPR55	-2.08904	-0.210798	3.16062e-05	0.00317451
SASH3	-2.09059	4.50948	6.6543e-06	0.000967112
IL18RAP	-2.09697	0.682134	2.47954e-06	0.00045465
P2RY13	-2.1056	2.02283	1.38556e-05	0.00173867
AL034397.3	-2.1062	1.17085	0.000103967	0.0074352
TRDC	-2.10811	-0.141744	5.59736e-06	0.000845319
AL121985.1	-2.11317	-2.24048	6.81487e-05	0.00552513
LILRB1	-2.11375	2.84548	6.56126e-07	0.000152154
ZNF80	-2.11719	-1.82466	0.00131137	0.0482683
MCOLN2	-2.11959	1.6509	8.34372e-06	0.0011491
AC103858.1	-2.12127	-3.28384	0.000251712	0.0146467
ZAP70	-2.12358	3.12933	6.47883e-05	0.00532496
PIK3CD-AS1	-2.12553	-3.08366	0.00010298	0.00739998
RPL31P11	-2.12845	-3.3498	6.70599e-05	0.00545597
PZP	-2.13161	-1.85508	5.31424e-07	0.000129923
CHI3L2	-2.13188	2.10465	0.000124198	0.00855232
AC008750.1	-2.13243	-2.64818	1.10984e-05	0.00146453
CD37	-2.13594	5.41326	3.84531e-05	0.00366385
AC005332.2	-2.13677	-1.14654	3.27602e-06	0.000561369
SLC12A3	-2.13863	-1.52728	8.64237e-05	0.00658365
CD72	-2.14066	3.29362	2.22868e-06	0.000420886
POU2F2	-2.1409	3.31655	1.57103e-06	0.00031761
TRGC2	-2.14207	0.278261	2.84937e-05	0.00292715
AP002957.1	-2.14618	-3.52115	0.000952234	0.0388506
TSPAN32	-2.1477	0.884199	1.49952e-06	0.00030709
CARMIL2	-2.15084	2.78352	4.59668e-05	0.0041302
HMGN2P19	-2.15108	-4.03794	0.000172727	0.0110171
TBATA	-2.15154	-3.73183	0.000393368	0.0204047
TRAV1-1	-2.15251	-3.41711	0.000689759	0.0310721
TMC8	-2.15368	4.73474	2.77138e-06	0.000491032
AL161756.2	-2.1551	-4.00331	7.30638e-05	0.00580424
HEATR9	-2.15601	-2.57662	2.77172e-05	0.00287548
CCL14	-2.15639	0.940867	0.000181398	0.011419
AC092145.1	-2.15833	-2.53996	0.000153406	0.0101641
CAMP	-2.16262	-1.5352	0.000290274	0.0163476
RPL7AP10	-2.16557	-2.22309	1.30077e-06	0.000275328
CCM2L	-2.16573	1.87512	6.80263e-11	5.36353e-08
AC064805.1	-2.16669	-2.47364	4.97341e-05	0.00438132
AC119396.1	-2.16774	0.334646	8.95234e-05	0.00672788
AC112229.3	-2.17212	-0.498113	4.01792e-08	1.62458e-05
NKG7	-2.17215	2.65338	6.32523e-07	0.000148658
CD300LB	-2.17262	0.81208	3.50324e-07	9.6074e-05
TRGV4	-2.1737	-2.56669	0.000172918	0.0110171
CD180	-2.17374	2.997	6.45549e-06	0.000946946
LTB	-2.17413	4.58722	0.000127256	0.00872481
SLC5A10	-2.17629	-1.07502	1.93595e-06	0.000372293
MAP4K1	-2.18417	3.47957	1.41157e-05	0.00175468
CCL2	-2.1872	5.42785	6.82344e-06	0.000987145
TXK	-2.18774	0.947399	5.1274e-07	0.000126334
TBC1D10C	-2.18829	3.63606	2.17244e-05	0.00242959
SCN4A	-2.19658	-0.623027	4.34835e-05	0.0039982
SNORD15B	-2.1992	-2.45231	0.000962998	0.0391884
HLA-DOB	-2.19967	2.55016	6.98867e-05	0.00559413
H3F3C	-2.20038	-1.5499	2.79564e-11	2.59321e-08
ACTG1P21	-2.20372	-4.09166	4.50509e-05	0.0040711
AC104699.1	-2.20376	-2.2971	0.000631666	0.0289557
CETP	-2.20442	1.1448	1.88382e-06	0.000364895
KMO	-2.2048	1.12451	7.69404e-08	2.92355e-05
PF4V1	-2.20674	-2.53797	0.000108219	0.0076697
GAPT	-2.20713	1.90411	2.87288e-05	0.00293219
SIGLEC14	-2.21142	2.12057	0.000354936	0.0187818
ADGRE1	-2.21254	0.193822	1.24579e-06	0.000265472
AIM2	-2.21646	1.67158	0.000545215	0.0259351
AL133371.2	-2.21979	-1.01753	6.53575e-05	0.005345
AC016027.2	-2.22458	-3.65453	9.19395e-05	0.00685482
REELD1	-2.22733	-2.69707	0.000195377	0.0121057
AL096816.1	-2.23498	-0.520033	9.57513e-05	0.00703917
IL13	-2.23943	-3.21047	0.000752553	0.0329639
ITGAL	-2.24248	4.57193	2.89736e-06	0.00050207
SP140	-2.24289	2.8369	2.47193e-05	0.00266728
GLYCTK-AS1	-2.24302	-2.37597	2.77071e-08	1.18085e-05
GVINP1	-2.24338	2.71187	2.71225e-05	0.00283242
AL031733.2	-2.24669	-1.66959	0.000603641	0.0281018
CCR6	-2.25056	-1.20071	5.6913e-05	0.00483806
AC073072.1	-2.25409	-2.12583	0.000210462	0.0128138
LINC02137	-2.26206	-3.66689	0.000138855	0.00931747
NPY1R	-2.26255	2.4216	3.47643e-05	0.00340495
AL162457.1	-2.2685	-3.80989	0.00106357	0.041824
NCR3	-2.2696	-0.0650134	0.00013276	0.00892748
RIPOR2	-2.27815	3.61451	3.92493e-05	0.00371725
FCMR	-2.28254	4.07001	0.000168315	0.0108365
ZC3H12D	-2.28367	1.72659	1.31097e-06	0.000275637
PTGDR	-2.2865	-0.0818848	4.5264e-08	1.80701e-05
UNC45B	-2.2866	-2.56228	1.01512e-05	0.00136234
KRT79	-2.29503	-0.4933	7.27292e-05	0.00579225
CCDC26	-2.29812	-3.89903	0.000346349	0.0184513
HK3	-2.29918	3.24288	1.72266e-06	0.000341693
DCSTAMP	-2.29973	0.694245	2.50227e-06	0.00045519
SNORA54	-2.30107	-3.65487	0.000604397	0.0281018
SCIMP	-2.30357	2.73735	4.40558e-07	0.000114829
RASGRP2	-2.30467	3.85358	3.2797e-05	0.00325267
AL031429.1	-2.3134	-3.83405	0.0012311	0.0463324
ZBTB20-AS1	-2.31487	-2.90402	1.15436e-07	4.00068e-05
AC010175.1	-2.31822	-3.09139	9.76222e-06	0.00132707
DIRC3-AS1	-2.32048	-3.94717	0.00011485	0.00804922
CXCL6	-2.32407	4.33625	0.000253647	0.014705
CD52	-2.32426	5.09504	3.3209e-06	0.00056309
IKZF3	-2.32669	4.31005	1.19009e-05	0.00154894
AL137786.1	-2.32734	-2.66899	2.67354e-06	0.000476374
LINC02576	-2.32802	-1.4194	0.00017597	0.0111663
LINC00528	-2.32925	-0.626846	2.61448e-07	7.7788e-05
PATL2	-2.33313	1.20945	1.58517e-07	5.15392e-05
LILRB5	-2.33674	2.25593	2.51135e-06	0.00045519
PGM5P3-AS1	-2.33958	-3.02613	0.000164694	0.0107095
E2F3P1	-2.34428	-3.07265	6.09742e-05	0.00506054
AL365475.1	-2.35155	-3.19943	4.09296e-06	0.000652052
ZNF560	-2.3587	-3.69842	0.00087248	0.0366883
Z97192.3	-2.36287	-2.65884	3.45526e-06	0.000579639
AP000924.1	-2.36399	-2.00327	0.000117609	0.00818151
C1QTNF1-AS1	-2.36632	-2.03648	1.06104e-05	0.00141194
AC243960.1	-2.37104	0.597184	1.97945e-05	0.0022784
CDHR1	-2.37569	-0.09641	1.08736e-05	0.00144089
SNORA73B	-2.38204	-0.563091	5.25384e-05	0.00453961
CELF2-AS1	-2.39202	-2.08823	9.23727e-05	0.00687087
CASP16P	-2.39361	-1.44216	1.39671e-07	4.73265e-05
ALAS2	-2.39471	-1.59646	0.000227917	0.0135624
TRGC1	-2.39863	-0.881296	1.58655e-06	0.000318705
AC008649.1	-2.39992	-4.05455	0.000411614	0.0209379
PRKCB	-2.40059	3.87289	1.76501e-05	0.00211654
NCF1C	-2.40303	1.27376	5.94916e-07	0.000143225
FAM53B-AS1	-2.40422	-3.69836	2.43344e-06	0.000449078
NFIA-AS2	-2.40736	-1.0226	8.59762e-07	0.000190938
AC012645.3	-2.40846	-1.17561	3.50352e-06	0.000584625
SEMA3D	-2.41591	1.83212	3.54413e-05	0.00343922
GTSF1L	-2.4218	-3.52381	0.000331204	0.0179168
AC010976.2	-2.42195	-0.821997	2.71871e-07	7.93914e-05
LINC01684	-2.42195	-2.08731	2.69897e-07	7.93914e-05
LINC01537	-2.42231	-1.42177	2.18434e-07	6.7539e-05
AC008040.1	-2.42235	-2.93233	1.66391e-05	0.00202611
SIRPG-AS1	-2.42779	-2.90619	0.000294753	0.0165114
MTHFD2P1	-2.43452	-3.05068	5.21635e-05	0.0045196
CD79B	-2.43493	3.80268	0.000362388	0.0190801
WDFY4	-2.436	4.30395	1.88591e-06	0.000364895
OR52N4	-2.43819	-2.35622	0.000166946	0.0108015
KLRK1	-2.43895	-0.88246	1.22768e-06	0.000263392
AC243960.7	-2.4413	-3.76363	0.000620562	0.0285712
TNXA	-2.44444	-1.78534	0.000182798	0.0114842
GPR18	-2.44557	0.241156	2.68198e-05	0.00281947
RSL24D1P11	-2.44747	-3.96099	7.58949e-05	0.00598393
LILRA1	-2.44912	0.221829	9.29208e-09	4.24715e-06
C10orf90	-2.45125	-2.68182	2.22919e-05	0.0024755
SIRPB3P	-2.45274	-3.8442	0.000780265	0.0338953
ADAD2	-2.45465	-1.96144	3.05314e-07	8.75364e-05
GGTLC1	-2.45496	-2.46375	0.000130232	0.00887014
AC003957.1	-2.45508	-3.30961	6.71228e-05	0.00545597
AIF1L	-2.45604	3.73978	3.10662e-10	2.17726e-07
IL9RP3	-2.45697	-1.53538	8.32496e-08	3.12563e-05
CFP	-2.45958	2.13036	1.41058e-07	4.73265e-05
ANKRD20A19P	-2.45962	-3.08311	0.000587502	0.0277095
ITGB2-AS1	-2.45969	2.43925	3.37119e-07	9.44836e-05
AC015909.3	-2.46001	-3.5542	0.000152035	0.0100945
RNU4-62P	-2.46121	-2.87554	1.78894e-06	0.000352622
AC060764.1	-2.46161	-4.03525	9.05508e-05	0.00678335
EOMES	-2.46194	1.03484	4.79286e-06	0.000752026
AL512378.1	-2.462	-3.99391	0.000465087	0.0230028
COL4A3	-2.46448	2.06655	1.02073e-05	0.00136405
AC007386.1	-2.46816	-3.88868	2.30122e-05	0.00252129
AL121985.3	-2.47447	-3.55496	0.000605912	0.0281018
TRG-AS1	-2.47469	0.637116	5.85837e-09	2.8869e-06
AL031658.1	-2.48131	-2.33077	5.83704e-09	2.8869e-06
CD79A	-2.48759	4.72427	0.000868798	0.0365823
PCDH11X	-2.48924	-3.46262	0.000530722	0.0253605
CPN2	-2.48937	-2.1809	0.000341184	0.0183006
GDPD2	-2.49071	1.43334	1.77304e-05	0.00211811
BANK1	-2.49188	3.81925	4.88904e-07	0.000122374
AC007728.2	-2.49321	-1.61609	1.03292e-08	4.58822e-06
NOX5	-2.496	0.46427	4.10089e-05	0.00381621
AC009951.1	-2.50017	-3.25056	3.2551e-09	1.71099e-06
AC023301.1	-2.50178	-1.13202	8.06026e-05	0.00629219
AL023653.1	-2.50503	-2.53761	1.03649e-06	0.000223895
KIR3DL1	-2.50725	-3.57009	0.000126513	0.00869274
BEND4	-2.5169	-0.333265	0.00088471	0.0370053
TREML2	-2.51927	0.512384	4.1777e-05	0.00386691
SLC9A5	-2.52482	0.91671	1.57819e-19	4.14775e-16
LINC01447	-2.52673	-3.94485	0.000132142	0.00891798
AL355076.3	-2.53155	-3.49472	0.000100226	0.00728564
FCRL4	-2.55156	-1.37751	0.000627192	0.0287924
ITPKB-IT1	-2.55816	-3.40664	0.000244144	0.0142727
KIR2DL3	-2.56158	-3.62128	0.000168364	0.0108365
LINC00926	-2.57264	3.18916	5.03197e-05	0.00440983
TTC24	-2.57425	-1.59275	5.94923e-05	0.00497684
LINC02132	-2.57465	-2.96037	0.000891716	0.0371997
RETN	-2.57633	1.44946	0.000176321	0.0111663
FP671120.5	-2.57969	-0.95389	3.38533e-07	9.44836e-05
FCRL6	-2.58207	0.13071	3.3534e-08	1.3735e-05
AL645608.2	-2.58912	-1.45756	0.000193998	0.0120677
TPO	-2.58983	0.154217	2.03132e-05	0.00232959
AC119428.2	-2.59203	-2.96001	0.00019658	0.0121564
C11orf21	-2.59406	0.893698	1.29296e-07	4.43231e-05
AC099792.1	-2.59799	-3.15018	3.19279e-05	0.00319664
AC004381.1	-2.59994	-3.38069	4.94618e-06	0.00077224
LINC02413	-2.60548	-2.96793	0.000164145	0.0106959
AC079793.1	-2.60864	-3.57873	4.05083e-05	0.00380223
IGHJ3P	-2.61404	-1.67495	0.000299268	0.0167346
CHI3L1	-2.61703	5.19577	7.27523e-07	0.000167479
IRX6	-2.62512	-1.80735	9.37781e-05	0.00694266
GLYATL1B	-2.63203	-3.6817	5.78062e-05	0.00490078
AC104971.3	-2.63518	-3.03645	0.00105147	0.0415555
CADM3-AS1	-2.63765	0.415384	2.28385e-05	0.00251846
KCNJ10	-2.64193	-0.435593	2.27279e-06	0.000426662
AL356234.1	-2.64866	-2.06116	1.06253e-07	3.85174e-05
AC079584.2	-2.64923	-3.63332	0.000173929	0.0110592
AC093010.2	-2.65452	-3.07132	8.15408e-05	0.00634387
AC016168.1	-2.66499	-3.90758	0.000412632	0.0209559
AC018755.4	-2.6661	-0.492524	5.47142e-06	0.000833611
KLRC4-KLRK1	-2.67265	-2.44825	1.47801e-07	4.85558e-05
KEL	-2.67267	0.245123	5.31395e-06	0.00081752
LINC00494	-2.67447	0.316128	9.86154e-05	0.00719938
TRAPPC3L	-2.67977	-3.22413	2.50222e-09	1.3606e-06
PSG5	-2.68088	-3.09714	0.000100581	0.00729226
CLEC17A	-2.68392	0.562084	0.000294258	0.0165114
LINC00173	-2.6903	-1.354	1.84776e-06	0.000361953
LINC02397	-2.69392	-0.167992	0.000742842	0.0326292
AC015911.6	-2.69557	-4.06457	0.000220882	0.0132689
KLRD1	-2.69745	1.71751	5.33211e-11	4.42537e-08
DDX11L10	-2.69846	-4.07354	0.000168809	0.010843
STAP1	-2.70721	1.1471	3.35952e-05	0.00331101
C12orf42	-2.7096	-1.69534	0.000264983	0.0152223
TBX21	-2.71777	0.404039	1.18247e-09	6.90606e-07
SCARNA5	-2.7206	-2.67386	0.000492567	0.02396
KLRC4	-2.72262	-3.1261	2.58801e-06	0.000463753
BTLA	-2.72611	1.04492	1.19803e-05	0.00154894
FAM238A	-2.72671	-3.52019	4.55946e-05	0.00410846
SCNN1G	-2.72973	1.94294	0.000151838	0.0100945
AC123912.4	-2.73468	0.0993379	4.46301e-05	0.00404546
MIR6774	-2.74368	-3.77299	3.61257e-05	0.00349489
AC008878.3	-2.74688	-2.612	0.000678428	0.0306537
LILRA4	-2.75772	0.367144	3.93314e-06	0.00063612
AC079015.1	-2.76088	-3.09558	6.39979e-08	2.49181e-05
ABHD17AP5	-2.77413	-3.44029	9.42446e-07	0.000204985
RN7SL752P	-2.78384	-3.68379	1.66051e-09	9.35166e-07
HCG22	-2.8028	-3.00769	1.86955e-05	0.00218369
AC004687.1	-2.80413	1.40625	5.7376e-07	0.000139194
CD36	-2.82109	5.0466	1.44554e-08	6.33188e-06
TM4SF19	-2.8223	-0.871542	2.39626e-08	1.03525e-05
AC060234.2	-2.828	-2.23681	4.33584e-07	0.000113953
LINC01800	-2.83048	-3.23901	0.000241247	0.0141948
FGFBP2	-2.83372	-0.893202	2.91432e-10	2.08891e-07
LINC01215	-2.83899	0.745786	6.00592e-05	0.00499775
CR786580.1	-2.84937	-3.30156	3.92581e-09	2.02971e-06
AC009970.1	-2.8503	-3.97751	0.000283803	0.0160118
LINC01857	-2.85116	0.0518012	2.43491e-06	0.000449078
AC018697.1	-2.85884	-3.75626	1.44423e-06	0.000297701
NPY5R	-2.86533	-1.8696	2.5544e-06	0.000460346
AC015660.4	-2.86859	-3.95313	6.90935e-06	0.000995009
CLECL1	-2.87532	-0.0876731	6.90206e-09	3.24891e-06
KLRF1	-2.87647	-0.440742	1.85735e-13	2.6626e-10
TNMD	-2.87705	-1.65647	0.000955789	0.0389453
AL356417.1	-2.88601	-3.34091	0.000131725	0.00891489
SERPINA9	-2.89428	-1.10147	0.000746591	0.0327482
CXCR5	-2.9013	-0.777282	0.000185216	0.01159
AC104024.1	-2.90375	-3.24533	3.05336e-05	0.00309636
SLC4A1	-2.90568	-3.01838	4.6633e-05	0.00416074
BTG1P1	-2.9069	-3.06873	4.21186e-07	0.000111625
Z84723.1	-2.91036	-2.89094	8.11142e-07	0.000182727
LEFTY2	-2.92046	-1.11535	7.81896e-10	4.93189e-07
EEF1A1P24	-2.922	-1.62964	5.19874e-15	8.62936e-12
RNU4-2	-2.92704	0.679419	0.00111418	0.0431628
PRAMENP	-2.92806	-1.73063	0.000278525	0.0158272
SCN11A	-2.93986	-0.959613	1.5976e-12	2.19066e-09
TLX1	-2.94788	-0.295705	2.42033e-06	0.000449078
AC104809.1	-2.94829	-3.87252	1.87692e-07	5.86081e-05
FAM30A	-2.95534	1.85306	4.39123e-05	0.00401422
SCARNA10	-2.96903	-2.71152	9.26743e-05	0.00687709
NCR1	-2.97683	-2.25928	8.20451e-11	6.31107e-08
TDGF1	-2.97873	-0.352752	3.84688e-07	0.000104589
KIR2DL1	-2.98058	-3.67499	2.10179e-06	0.000399314
MIR4537	-2.98334	-3.11476	0.000933588	0.038438
KIR3DX1	-2.98361	-3.51394	2.74162e-09	1.46551e-06
CD160	-2.99841	-0.97516	1.55735e-21	4.91156e-18
DEFA3	-3.00564	-3.74934	0.000535794	0.0255255
BFSP2	-3.00567	-2.08608	9.55391e-08	3.50362e-05
SLC7A10	-3.00754	-1.46395	0.000594079	0.0278811
TNFRSF13C	-3.02079	3.2554	1.38471e-05	0.00173867
TRDV1	-3.03671	-3.13436	4.7186e-07	0.000119052
FABP4	-3.03871	4.38692	2.57746e-05	0.00273697
AL451067.1	-3.05306	-4.06505	1.1703e-05	0.00153149
GDF7	-3.05691	1.31446	8.12072e-12	8.83142e-09
MIR4538	-3.06619	-2.82897	0.000648654	0.0295625
LINC01539	-3.06963	-3.48863	9.64654e-05	0.00705876
CR2	-3.07572	5.17152	0.000894929	0.0372352
LINC00996	-3.08636	0.00362953	4.52011e-12	5.48289e-09
SIGLEC11	-3.09178	0.156221	6.69663e-11	5.36353e-08
KRT17P8	-3.09291	-3.67049	2.8926e-06	0.00050207
HBB	-3.10251	5.02861	4.02519e-06	0.000647686
LINC02245	-3.1029	-3.55584	2.18883e-05	0.00243927
AC093010.1	-3.10335	-3.80514	4.95607e-05	0.00437827
AC008033.3	-3.10862	-3.16227	5.46663e-06	0.000833611
NPIPA9	-3.12161	-3.24527	1.23554e-15	2.29214e-12
AP001605.1	-3.12277	-3.79244	1.14526e-09	6.81493e-07
AC098935.2	-3.15366	-2.66763	0.000211227	0.0128356
FCAMR	-3.16578	0.589933	1.27518e-05	0.0016282
FCER2	-3.17284	2.45419	0.000300019	0.0167469
HBA2	-3.18382	3.01339	4.50009e-07	0.000116331
PSG9	-3.18816	-3.75689	9.20835e-06	0.00126266
AC104809.2	-3.19406	-0.890632	2.48646e-05	0.00266728
PARP15	-3.19925	2.76948	4.19387e-11	3.67407e-08
LINC02422	-3.20247	-1.12521	9.52519e-05	0.00701882
AC007381.1	-3.22546	-3.64479	0.000446906	0.0222662
FCRLA	-3.24264	2.37465	3.24917e-05	0.00323875
CR1	-3.24607	2.63339	1.12913e-09	6.81493e-07
AL161781.2	-3.24665	-2.53646	0.000636071	0.029031
LY86-AS1	-3.26647	-2.39944	2.22516e-07	6.8133e-05
FAM129C	-3.27393	2.6077	2.46276e-05	0.00266728
IDI2-AS1	-3.27992	-2.72271	5.56411e-15	8.77405e-12
MIR3609	-3.29124	-3.95124	2.31039e-05	0.00252129
BLK	-3.29126	2.89417	1.80256e-05	0.0021353
HBA1	-3.29151	-1.96786	5.60186e-06	0.000845319
CRHBP	-3.29499	-0.608367	1.03124e-09	6.3771e-07
DEFA4	-3.31574	-3.95682	5.1263e-07	0.000126334
TLR10	-3.33246	1.78877	1.00221e-08	4.51537e-06
KRT75	-3.33625	-1.84592	1.92488e-05	0.0022286
ATP4B	-3.34901	-3.70569	2.19095e-09	1.21225e-06
SNORD17	-3.35699	-1.09968	1.3972e-09	8.0118e-07
FCRL5	-3.36672	2.63324	4.71465e-08	1.85863e-05
AMTN	-3.37592	0.0584501	2.11093e-05	0.00239477
ADRA1A	-3.37731	-1.951	1.88671e-12	2.47929e-09
LINC01894	-3.37919	-3.34359	6.44279e-10	4.30523e-07
DNAH17-AS1	-3.3926	-1.92236	1.69617e-11	1.67169e-08
AC007952.6	-3.39628	-3.32722	5.31831e-09	2.7053e-06
LINC01781	-3.40228	-0.082819	1.4481e-05	0.00179098
BTBD6P1	-3.40692	-2.77066	2.128e-05	0.00240548
CD19	-3.45274	2.87812	2.82578e-06	0.000497875
OR5G3	-3.45361	-4.0428	1.63825e-06	0.000327007
P2RX5	-3.48455	2.4748	8.85024e-08	3.28375e-05
KCNT1	-3.48897	-0.629708	2.67801e-26	1.20656e-22
KRT73	-3.5221	-3.31231	4.74475e-06	0.0007482
TLX1NB	-3.552	-3.89261	2.54634e-07	7.64823e-05
GPR182	-3.59641	-1.32859	5.23015e-18	1.26883e-14
RF00100	-3.60205	-0.284581	2.42256e-12	3.05611e-09
CD22	-3.60756	4.2687	7.37527e-10	4.74696e-07
CNR2	-3.63296	1.21788	8.38229e-07	0.00018749
TNFRSF13B	-3.64678	0.685733	2.32874e-07	7.06191e-05
DNASE1L3	-3.64746	1.21529	6.66237e-12	7.50421e-09
PAX5	-3.65842	3.17781	8.65755e-07	0.000190938
ITGAD	-3.67228	-0.500986	3.23078e-15	5.66068e-12
ABCA9-AS1	-3.78519	-3.43507	2.37078e-10	1.73883e-07
TEX101	-3.78541	-2.67792	3.096e-07	8.79654e-05
KLHL14	-3.83398	0.284511	6.55245e-10	4.30523e-07
CHRNA4	-3.86631	-2.98101	3.11608e-08	1.29309e-05
KRT72	-3.91577	-2.079	4.68191e-07	0.000119052
FCRL3	-3.92445	2.41655	4.12852e-11	3.67407e-08
MMP12	-3.93526	4.33978	9.61405e-16	1.89505e-12
MS4A1	-3.9381	4.75232	6.07835e-07	0.000145227
FCRL2	-3.93814	1.6462	6.23215e-09	3.02384e-06
FCRL1	-3.94511	2.06163	7.93466e-07	0.000180031
UMODL1-AS1	-4.01664	-3.57095	4.88967e-12	5.7115e-09
AC108206.1	-4.01853	-2.33391	1.34838e-06	0.000281624
AL137789.1	-4.0895	-4.03249	6.43563e-09	3.07525e-06
AC012123.1	-4.10803	-3.30191	3.01607e-08	1.26828e-05
AC073850.1	-4.16241	-3.64002	3.7553e-14	5.63975e-11
AC023154.1	-4.32237	-2.65397	2.05131e-24	8.08676e-21
LRTM1	-4.32398	-3.82587	3.94152e-10	2.70234e-07
HIST2H3C	-4.34006	-3.64531	2.8613e-07	8.27888e-05
U62631.1	-4.3635	-2.0073	5.07993e-11	4.33003e-08
AC008609.1	-4.39825	-3.7498	7.89259e-17	1.65944e-13
TBC1D27P	-4.46268	0.547435	1.55629e-11	1.5833e-08
NKX2-5	-4.54892	-2.62433	1.10112e-19	3.15701e-16
STAB2	-4.55217	0.911133	2.73931e-23	9.59915e-20
OR5G5P	-4.7588	-3.69845	2.60467e-11	2.48927e-08
CXCR2P1	-4.78378	-0.120487	2.16863e-17	4.88531e-14
AC245884.6	-4.78896	-3.99983	1.32188e-10	9.92605e-08
AC010970.1	-4.80924	0.416213	8.70935e-09	4.03934e-06
FAM9C	-5.62277	-3.29231	1.04667e-36	6.60195e-33
NR5A1	-6.04973	0.133641	8.96498e-12	9.42459e-09
SPIC	-6.1135	-3.07882	6.09166e-28	3.20198e-24
AC127496.1	-6.16366	-1.77707	6.86361e-88	1.08232e-83
LMAN1L	-7.60958	-3.4075	5.94645e-55	4.68848e-51
AC091230.1	-8.16169	-2.11238	3.53618e-84	3.71747e-80
CD5L	-10.1301	1.12366	5.26975e-92	1.66197e-87
